# Supplementary material for: The role of interfacial tension in the size-dependent phase separation of atmospheric aerosol particles
Source: Copernicus journal article supplement (doi:10.5194/acp-25-327-2025), 2025-01-09
Supplement: Supplementary file 1 [file acp-25-327-2025-supplement.pdf]

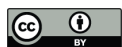

*Supplement of*

## **The role of interfacial tension in the size-dependent phase separation of atmospheric aerosol particles**

**Ryan Schmedding and Andreas Zuend**

*Correspondence to:* Andreas Zuend ([andreas.zuend@mcgill.ca](mailto:andreas.zuend@mcgill.ca))

The copyright of individual parts of the supplement might differ from the article licence.

**Table S1.** List of abbreviations used in this work and their meanings.

| <b>Abbreviation</b> | <b>Meaning</b>                                                             |
|---------------------|----------------------------------------------------------------------------|
| AIOMFAC             | Aerosol Inorganic–Organic Mixtures Functional groups Activity Coefficients |
| CCN                 | Cloud Condensation Nucleus                                                 |
| CSOA                | Complex Secondary Organic Aerosol mixture                                  |
| IFE                 | Interfacial Energy                                                         |
| LLE                 | Liquid–Liquid Equilibrium                                                  |
| LL                  | Liquid–Liquid                                                              |
| LLPS                | Liquid–Liquid Phase Separation                                             |
| OIR                 | Organic-to-Inorganic dry mass Ratio                                        |
| PM                  | Particulate Matter                                                         |
| RH                  | Relative Humidity                                                          |
| SOA                 | Secondary Organic Aerosol                                                  |
| SRH                 | Separation Relative Humidity                                               |

Table S2: List of mathematical symbols used in this work and their meanings.

| Category                  | Symbol                                                                                               | Meaning                                                | Units                             |
|---------------------------|------------------------------------------------------------------------------------------------------|--------------------------------------------------------|-----------------------------------|
| Mathematical<br>Variables | $A$                                                                                                  | area of the surface                                    | $\text{m}^2$                      |
|                           | $\mathcal{A}$                                                                                        | partial molar area                                     | $\text{m}^2 \text{mol}^{-1}$      |
|                           | $D$                                                                                                  | diameter                                               | $\text{m}$                        |
|                           | $d$                                                                                                  | distance                                               | $\text{m}$                        |
|                           | $G$                                                                                                  | Gibbs energy                                           | $\text{J}$                        |
|                           | $M$                                                                                                  | molar mass                                             | $\text{kg mol}^{-1}$              |
|                           | $n$                                                                                                  | number of moles                                        | $\text{mol}$                      |
|                           | $P$                                                                                                  | pressure                                               | $\text{Pa}$                       |
|                           | $R$                                                                                                  | universal gas constant                                 | $\text{J mol}^{-1} \text{K}^{-1}$ |
|                           | $r$                                                                                                  | radius                                                 | $\text{m}$                        |
|                           | $S$                                                                                                  | entropy or saturation ratio (depending on context)     | $\text{J K}^{-1}$<br>or –         |
|                           | $T$                                                                                                  | temperature                                            | $\text{K}$                        |
| $U$                       | internal energy                                                                                      | $\text{J}$                                             |                                   |
| $V$                       | system volume                                                                                        | $\text{m}^3$                                           |                                   |
| $\mathcal{V}$             | molar volume                                                                                         | $\text{m}^3 \text{mol}^{-1}$                           |                                   |
| $x$                       | mole fraction                                                                                        | –                                                      |                                   |
| Greek Letter<br>Variables | $\eta$                                                                                               | exponential scaling factor for interfacial composition | -                                 |
|                           | $\gamma$                                                                                             | activity coefficient                                   | -                                 |
|                           | $\delta$                                                                                             | thickness of Guggenheim surface phase                  | $\text{m}$                        |
|                           | $\iota$                                                                                              | length of a three-phase boundary line                  | $\text{m}$                        |
|                           | $\mu$                                                                                                | chemical potential                                     | $\text{J mol}^{-1}$               |
|                           | $\rho$                                                                                               | density                                                | $\text{kg m}^{-3}$                |
|                           | $\sigma$                                                                                             | surface or interfacial tension                         | $\text{J m}^{-2}$                 |
|                           | $\tau$                                                                                               | line energy at a three-phase boundary                  | $\text{J m}^{-1}$                 |
| $\varepsilon$             | fraction of the total particle amount of species partitioned to the surface phase (surface fraction) | -                                                      |                                   |
| $\alpha$                  | inorganics-rich phase                                                                                | –                                                      |                                   |
| $\beta$                   | organics-rich phase                                                                                  | –                                                      |                                   |
| <b>b</b>                  | bulk phase                                                                                           | –                                                      |                                   |
| disp                      | dispersion force based calculation                                                                   | –                                                      |                                   |
| el                        | inorganic electrolyte species                                                                        | –                                                      |                                   |

|          |                                                                                        |   |
|----------|----------------------------------------------------------------------------------------|---|
| G        | Gas-phase property                                                                     | — |
| <i>i</i> | chemical component or species index                                                    | — |
| o        | standard or reference state                                                            | — |
| $\phi$   | phase index or semi-empirical Girifalco–Good equation parameter (depending on context) | — |
| ls       | Liquid–Surface                                                                         | — |
| p        | particle                                                                               | — |
| /        | liquid–liquid-interface-corrected property                                             | — |
| s        | surface phase                                                                          | — |
| sat      | saturation                                                                             | — |
| suppr    | suppression limit                                                                      | — |
| tot      | total                                                                                  | — |
| vf       | volume-fraction-based                                                                  | — |
| w        | water                                                                                  | — |
| *        | measurable                                                                             | — |

---

Table S3: Reference pure-component liquid-state surface tension values at 298 K ( $\sigma_i^\circ$ ) and dry particle mass fractions for the systems discussed in this work. Organic compounds of unknown  $\sigma_i^\circ$  due to lack of experimental data were assigned  $\sigma_i^\circ = 35 \text{ mJ m}^{-2}$ .  $\sigma_w^\circ = 71.98 \text{ mJ m}^{-2}$  at 298 K (Vargaftik et al., 1983).

| Compound                                        | Figure              | Molar Mass<br>[kg mol <sup>-1</sup> ] | Dry Mass Frac<br>[-]     | $\sigma_i^\circ$<br>[mJ m <sup>-2</sup> ] | Reference                                   |
|-------------------------------------------------|---------------------|---------------------------------------|--------------------------|-------------------------------------------|---------------------------------------------|
| Glutaric acid                                   | 2A                  | 0.132115                              | 1.00*                    | 45.0                                      | Booth et al. (2009)                         |
| NaCl                                            | 2B                  | 0.058443                              | 1.00*                    | 174.0                                     | Dutcher et al. (2010)                       |
| PEG-400 n7                                      | 3, 4A, 6,           | 0.3704376                             | 0.155                    | 44.5                                      | Sequeira et al. (2019)                      |
| PEG-400 n8                                      | 8A, S1A,            | 0.4144904                             | 0.345                    | 44.5                                      | Sequeira et al. (2019)                      |
| (NH <sub>4</sub> ) <sub>2</sub> SO <sub>4</sub> | S2, S3              | 0.132139                              | 0.500                    | 184.5                                     | Dutcher et al. (2010)                       |
| Benzene                                         | 4B, S1B             | 0.078108                              | 0.57-0.9999 <sup>†</sup> | 28.75                                     | Součková et al. (2013)                      |
| NaCl                                            |                     | 0.058443                              | 0.0001-0.43 <sup>†</sup> | 174.5                                     | Dutcher et al. (2010)                       |
| Dodecane                                        | 4C, S1C             | 0.148152                              | 0.67-0.9999 <sup>†</sup> | 25.0                                      | Koller et al. (2017)                        |
| KCl                                             |                     | 0.074551                              | 0.0001-0.33 <sup>†</sup> | 155.4                                     | Dutcher et al. (2010)                       |
| Benzene                                         | 4D, S1D             | 0.078108                              | 0.55-0.9999 <sup>†</sup> | 28.75                                     | Součková et al. (2013)                      |
| Methanol                                        |                     | 0.032042                              | 0.0001-0.45 <sup>†</sup> | 22.5                                      | Jasper (1972)                               |
| Suberic acid                                    | 5                   | 0.174156                              | 0.537                    | 45.0                                      | Hyvärinen et al. (2006)                     |
| (NH <sub>4</sub> ) <sub>2</sub> SO <sub>4</sub> |                     | 0.132139                              | 0.463                    | 184.5                                     | Dutcher et al. (2010)                       |
| PEG-300 n5                                      | 7A, 8A,<br>S4A, S5A | 0.282332                              | 0.181                    | 43.6                                      | Ai et al. (2022)                            |
| PEG-300 n6                                      |                     | 0.326384                              | 0.168                    | 43.6                                      | Ai et al. (2022)                            |
| (NH <sub>4</sub> ) <sub>2</sub> SO <sub>4</sub> |                     | 0.132139                              | 0.651                    | 184.5                                     | Dutcher et al. (2010)                       |
| 1,2,6-Hexanetriol                               | 7B, 8B, 9,          | 0.134172                              | 0.504                    | 48.5                                      | Sigma-Aldrich (2006)                        |
| (NH <sub>4</sub> ) <sub>2</sub> SO <sub>4</sub> | S4B, S5B            | 0.132139                              | 0.496                    | 184.5                                     | Dutcher et al. (2010)                       |
| 1,2,5,8-Octanetetrol                            |                     | 0.178224                              | 0.0505                   | 35.0                                      | –                                           |
| 2-Methylglutaric acid                           |                     | 0.146104                              | 0.0504                   | 50.0                                      | Hyvärinen et al. (2006) <sup>‡</sup>        |
| 3,5-Dihydroxybenzoic acid                       |                     | 0.142054                              | 0.0464                   | 70.5                                      | Tuckermann and Cammenga (2004) <sup>§</sup> |
| 3-Hydroxybenzoic acid                           | 7C, 8C,<br>S4C, S5C | 0.138082                              | 0.0252                   | 70.5                                      | Tuckermann and Cammenga (2004)              |
| 3-Methyladipic acid                             |                     |                                       |                          |                                           | Riipinen et al. (2007) <sup>¶</sup>         |
| Levogluconan                                    |                     | 0.162122                              | 0.0504                   | 22.7                                      | Topping et al. (2007)                       |
| Malic acid                                      |                     | 0.134052                              | 0.0504                   | 50.0                                      | Hyvärinen et al. (2006)                     |
| Pinolic acid                                    |                     | 0.186226                              | 0.0067                   | 35.0                                      | –                                           |
| Pinonic acid                                    |                     | 0.196176                              | 0.0140                   | 66.1                                      | Varga et al. (2007)                         |

|                                                 |                     |          |                       |       |                                   |
|-------------------------------------------------|---------------------|----------|-----------------------|-------|-----------------------------------|
| Succinic acid                                   |                     | 0.118052 | 0.0504                | 47.5  | Hyvärinen et al. (2006)           |
| (NH <sub>4</sub> ) <sub>2</sub> SO <sub>4</sub> |                     | 0.132139 | 0.605                 | 184.5 | Dutcher et al. (2010)             |
| C107OOH (MCM name)                              |                     | 0.200166 | $8.92 \times 10^{-4}$ | 35.0  | –                                 |
| Pinonic acid                                    |                     | 0.184166 | $4.64 \times 10^{-4}$ | 66.1  | Varga et al. (2007)               |
| C97OOH (MCM name)                               |                     | 0.188174 | $9.65 \times 10^{-3}$ | 35.0  | –                                 |
| C108OOH (MCM name)                              |                     | 0.21613  | 0.37                  | 35.0  | –                                 |
| Pinalic acid                                    |                     | 0.170166 | $6.97 \times 10^{-5}$ | 35.0  | –                                 |
| Pinic acid                                      |                     | 0.186166 | $3.05 \times 10^{-2}$ | 23.8  | Topping et al. (2007)             |
| C921OOH (MCM name)                              | 7D, 8D,<br>S4D, S5D | 0.204182 | $3.83 \times 10^{-2}$ | 35.0  | –                                 |
| C109OOH (MCM name)                              |                     | 0.200174 | $6.46 \times 10^{-5}$ | 35.0  | –                                 |
| C812OOH (MCM name)                              |                     | 0.158174 | $3.27 \times 10^{-2}$ | 35.0  | –                                 |
| 10-Hydroxypinonic acid                          |                     | 0.206138 | $9.49 \times 10^{-3}$ | 66.1  | Varga et al. (2007) <sup>  </sup> |
| C811OH (MCM name)                               |                     | 0.158174 | $2.88 \times 10^{-4}$ | 35.0  | –                                 |
| C813OOH (MCM name)                              |                     | 0.206138 | $1.39 \times 10^{-2}$ | 35.0  | –                                 |
| Aldol dimer                                     |                     | 0.368298 | $4.50 \times 10^{-3}$ | 35.0  | –                                 |
| Ester dimer                                     |                     | 0.368306 | $1.80 \times 10^{-2}$ | 35.0  | –                                 |
| (NH <sub>4</sub> ) <sub>2</sub> SO <sub>4</sub> |                     | 0.132139 | 0.471                 | 184.5 | Dutcher et al. (2010)             |

\* binary systems were run assuming the dry composition case is pure solute.

† the system was run at variable dry composition at fixed RH to replicate measurements.

‡ estimated from structural similarity to glutaric acid.

§ estimated from structural similarity to hydroxybenzoic acid.

¶ estimated from structural similarity to adipic acid.

|| estimated from structural similarity to pinonic acid.

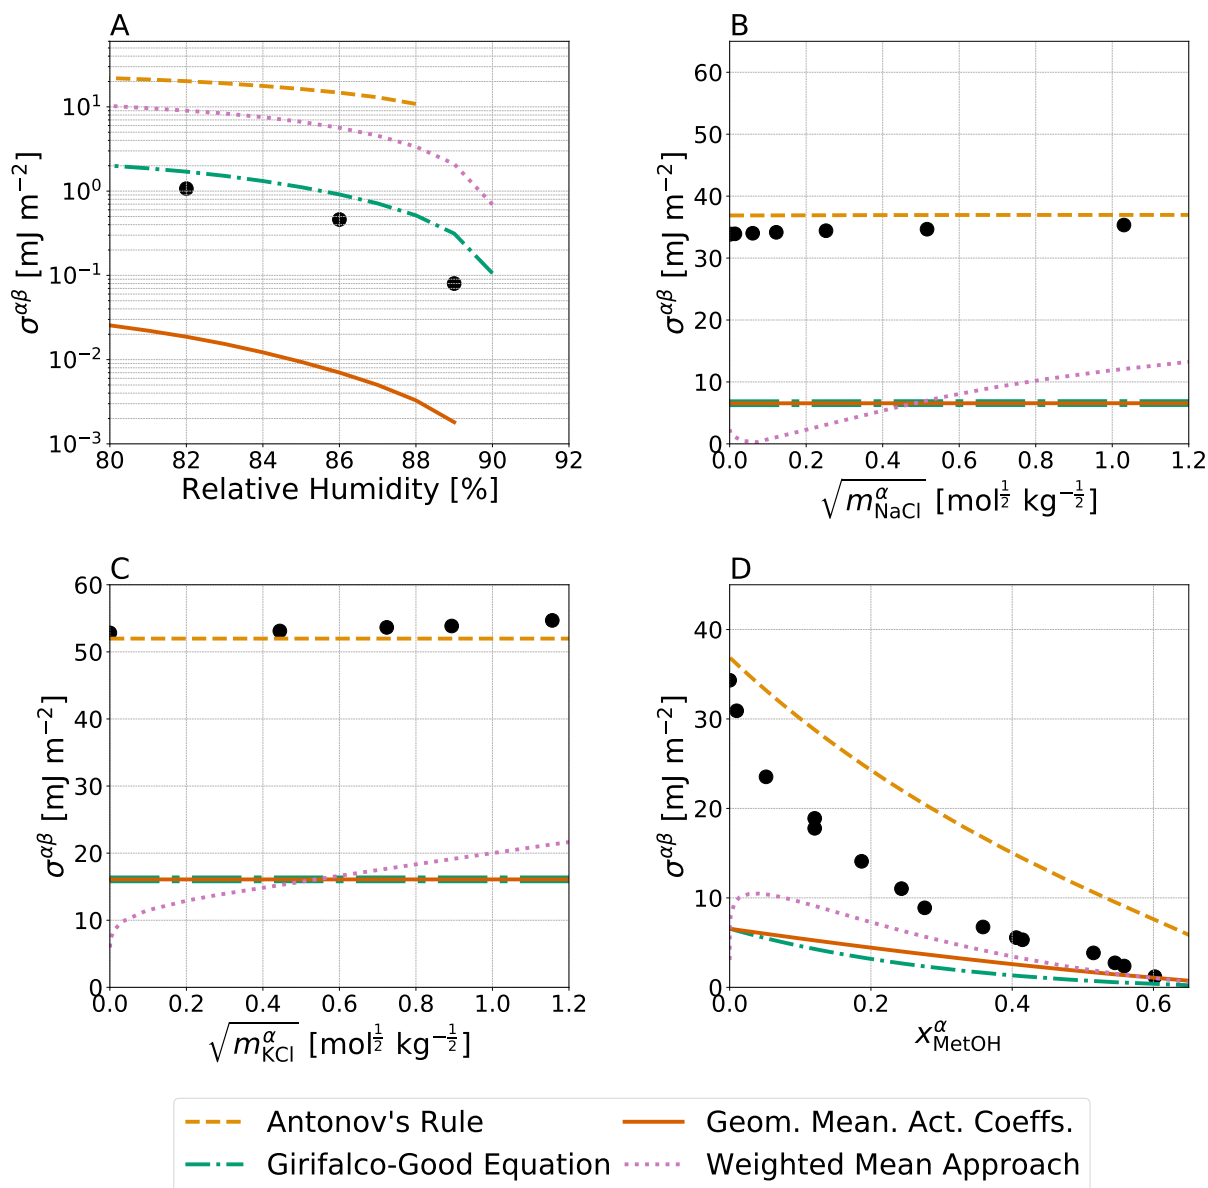

**Figure S1.** Predicted  $\sigma^{\alpha\beta}$  with adjustments to  $\sigma_{\text{org}}^{\circ}$  and  $\sigma_{\text{el}}^{\circ} = \sigma_{\text{w}}^{\circ} \cdot \sigma_{\text{PEG-400}}^{\circ}$ ,  $\sigma_{\text{benzene}}^{\circ}$ , and  $\sigma_{\text{MetOH}}^{\circ} = 35 \text{ mJ m}^{-2}$  in subplots A, C, and D. In subplot D,  $\sigma_{\text{decane}}^{\circ} = 20 \text{ mJ m}^{-2}$ . These values were selected to better fit Antonov's rule to the measured data for the systems shown in subplots B and C and to explore the sensitivity of the more miscible systems shown in subplots A and D to changes in  $\sigma_{\text{org}}^{\circ}$  and  $\sigma_{\text{el}}^{\circ}$ .

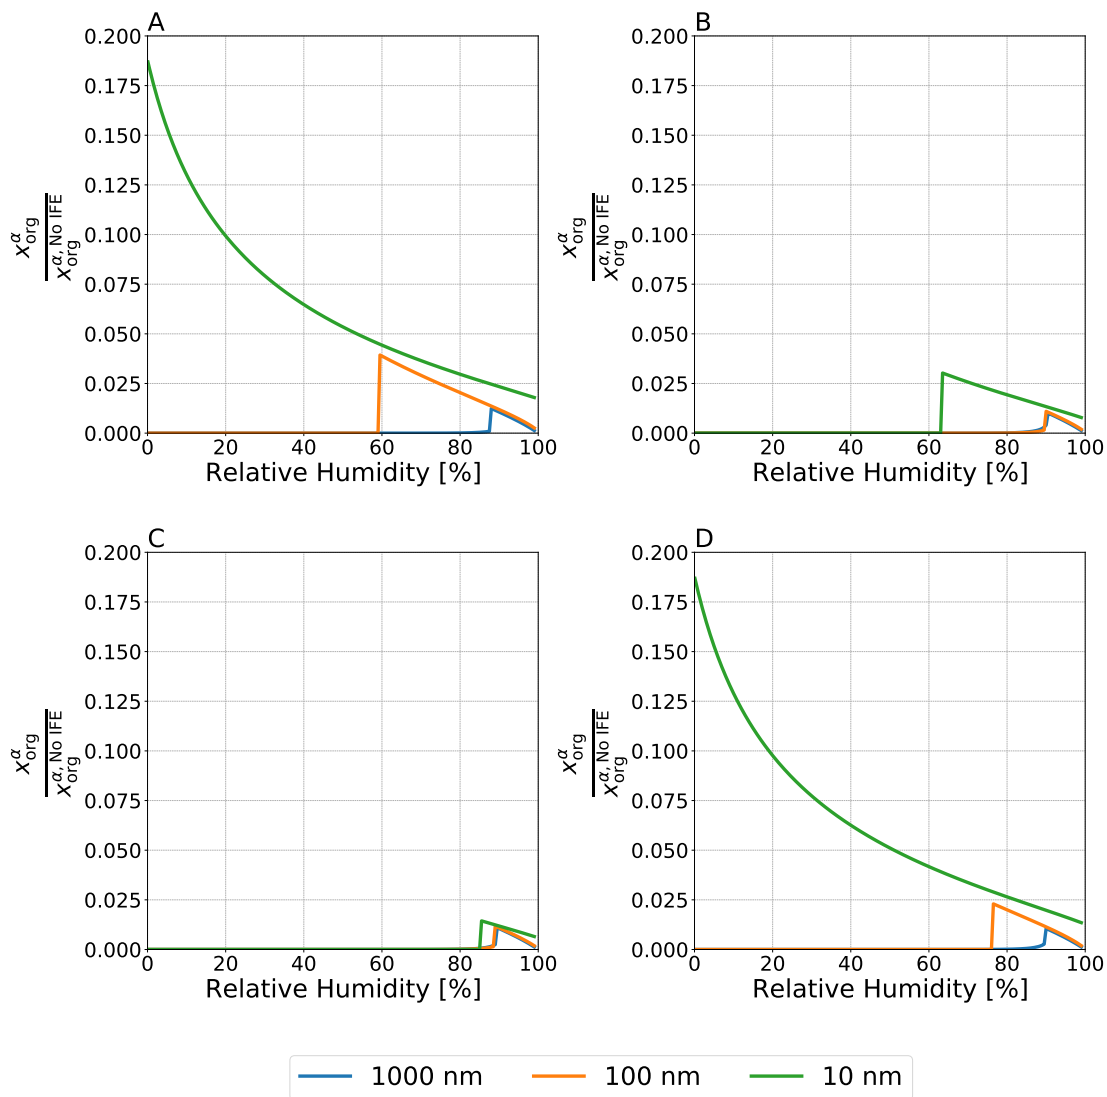

**Figure S2.** Normalized mole fraction of PEG-400 in the aqueous phase for water, PEG-400, and ammonium sulfate particles with dry diameters ranging from 10 nm to 1000 nm for (A) Antonov's rule, (B) the Girifalco–Good equation, (C) Butler equation with modified activity coefficients, and (D) the weighted mean interfacial composition approach.



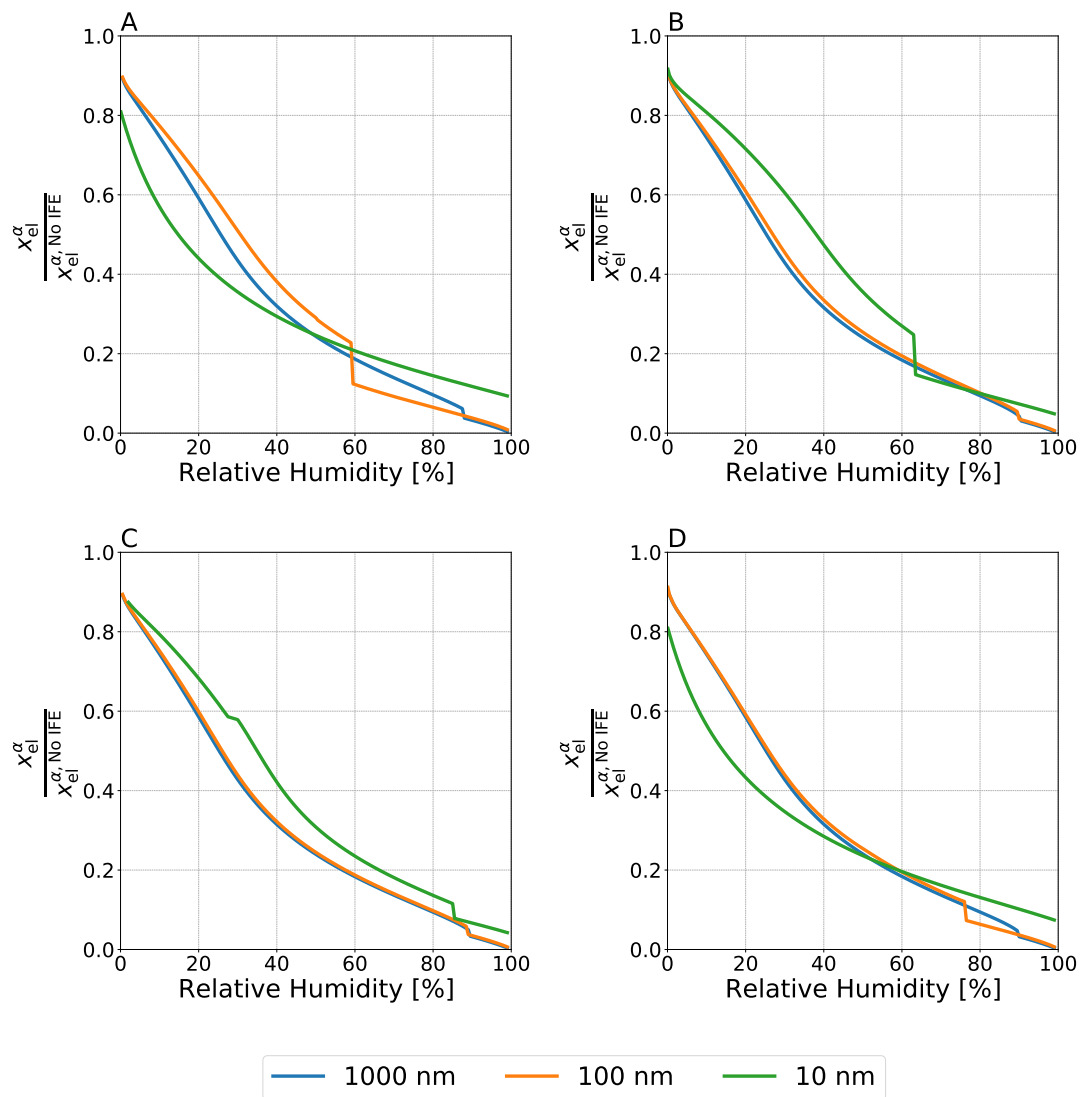

**Figure S3.** Normalized mole fraction of ammonium sulfate in the aqueous phase for water, PEG-400, and ammonium sulfate particles with dry diameters ranging from 10 nm to 1000 nm for (A) Antonov's rule, (B) the Girifalco-Good equation, (C) Butler equation with modified activity coefficients, and (D) the weighted mean interfacial composition approach.

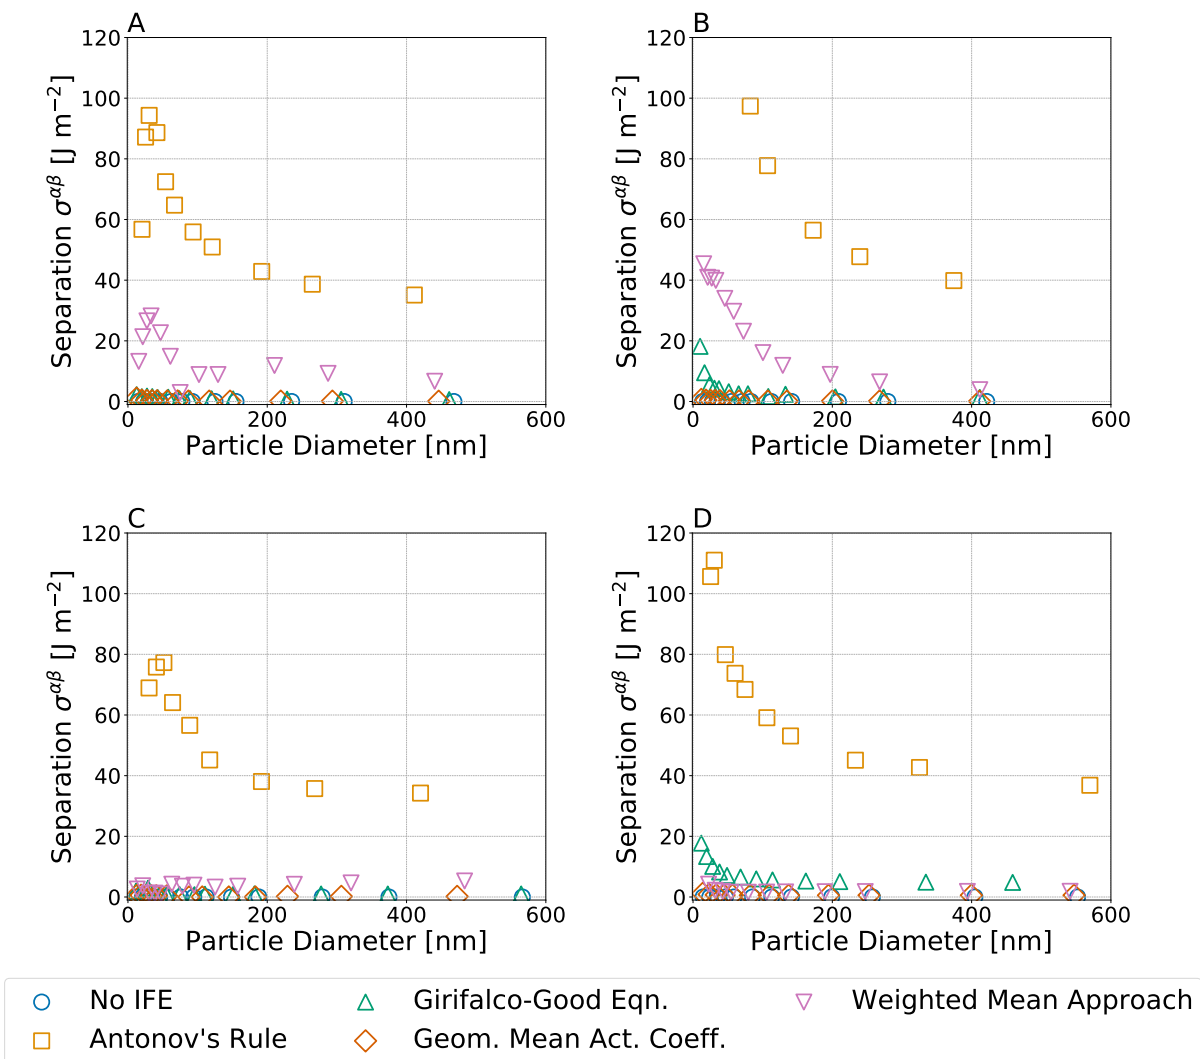

**Figure S4.** Predicted  $\sigma^{\alpha\beta}$  at the onset of LLPS upon dehumidification, shown for a range of particle (wet) diameters at  $T = 298$  K. The systems shown are: (A) Water-PEG-300-ammonium sulfate, (B) water-1,2,6-hexanetriol-ammonium-sulfate, (C) water, a CSOA mixture with succinic acid and ammonium sulfate, and (D) water,  $\alpha$ -pinene SOA surrogates, and ammonium sulfate. Distinct symbols refer to different approaches used for the LL interfacial tension estimations; see legend. For particles with stronger size-dependent onset of LLPS, there is less agreement among the predicted  $\sigma^{\alpha\beta}$  at the onset of phase separation. At these sizes, complete partitioning of one species into the aqueous, organic, or surface phase leads to greater differences in the internal composition of the particle.

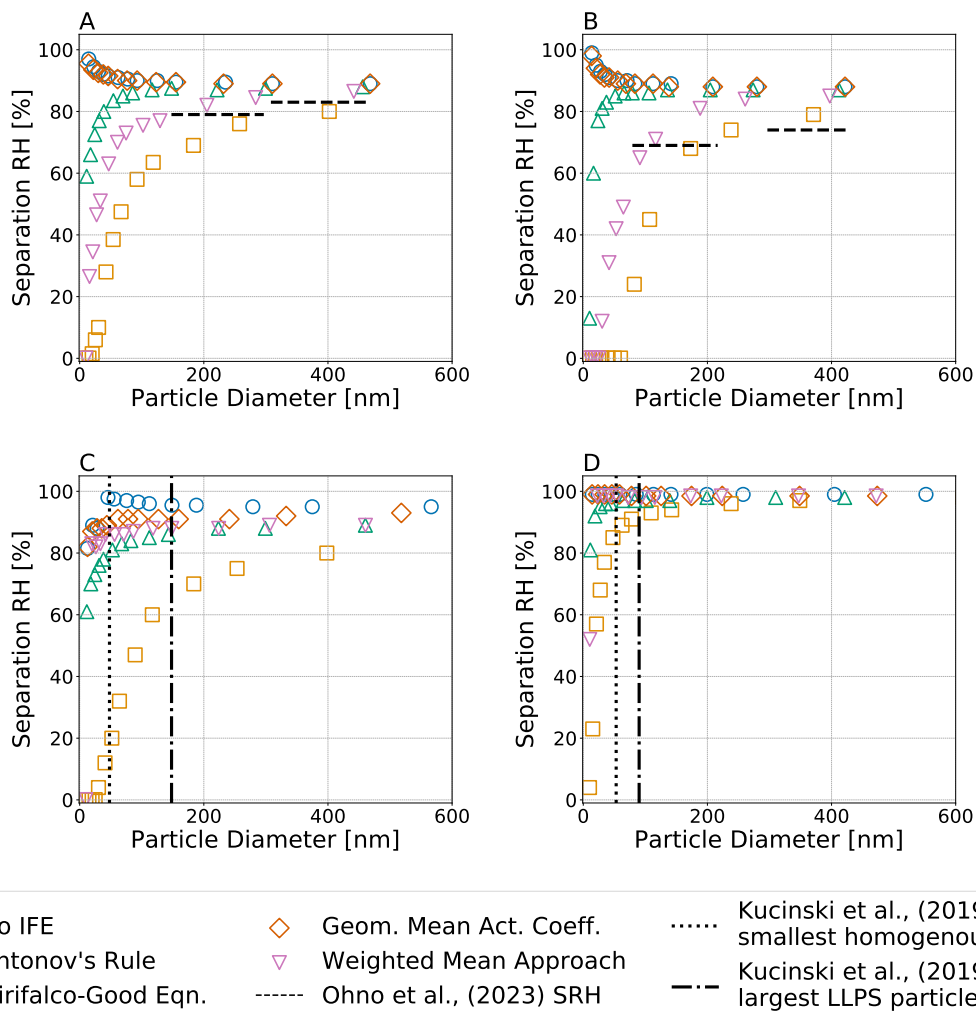

**Figure S5.** Predicted equilibrium separation RH versus particle wet diameter for particles of the same dry composition but different choices of interfacial tension treatment; see legend. In this case it is assumed that  $\sigma^{ls} = 0$  and therefore  $\sigma^{s*} = \sigma^s$ . Systems shown are: (A) water-PEG-300-ammonium-sulfate; (B) water-1,2,6-hexanetriol-ammonium-sulfate; (C) water-CSOA-with-succinic-acid-ammonium-sulfate; (D) water- $\alpha$ -pinene-SOA-ammonium-sulfate. Shown by dashed horizontal lines in (A, B) are measured equilibrium separation RH values by Ohno et al. (2023). Shown in (C, D) by vertical lines are the observed largest homogenous and smallest phases-separated particles as determined by Kucinski et al. (2019). All calculations were performed at 298 K.

## References

- Ai, J., Li, F., Zhang, J., and Wu, Z.: Density, viscosity, surface tension, and spectral analysis of polyethylene glycol 300 + 1,2-Propylenediamine binary liquid mixture, *Journal of Molecular Liquids*, 361, 119579, 5 <https://doi.org/https://doi.org/10.1016/j.molliq.2022.119579>, 2022.
- Booth, A. M., Topping, D. O., McFiggans, G., and Percival, C. J.: Surface tension of mixed inorganic and dicarboxylic acid aqueous solutions at 298.15 K and their importance for cloud activation predictions, *Phys. Chem. Chem. Phys.*, 11, 8021–8028, <https://doi.org/10.1039/B906849J>, 2009.
- Dutcher, C. S., Wexler, A. S., and Clegg, S. L.: Surface Tensions of Inorganic Multicomponent Aqueous Electrolyte Solutions and Melts, 10 *The Journal of Physical Chemistry A*, 114, 12 216–12 230, <https://doi.org/10.1021/jp105191z>, pMID: 21043484, 2010.
- Hyvärinen, A.-P., Lihavainen, H., Gaman, A., Vairila, L., Ojala, H., Kulmala, M., and Viisanen, Y.: Surface Tensions and Densities of Oxalic, Malonic, Succinic, Maleic, Malic, and cis-Pinonic Acids, *Journal of Chemical & Engineering Data*, 51, 255–260, <https://doi.org/10.1021/je050366x>, 2006.
- Jasper, J. J.: The Surface Tension of Pure Liquid Compounds, *Journal of Physical and Chemical Reference Data*, 1, 841–1010, 15 <https://doi.org/10.1063/1.3253106>, 1972.
- Koller, T. M., Klein, T., Giraudet, C., Chen, J., Kalantar, A., van der Laan, G. P., Rausch, M. H., and Fröba, A. P.: Liquid Viscosity and Surface Tension of n-Dodecane, n-Octacosane, Their Mixtures, and a Wax between 323 and 573 K by Surface Light Scattering, *Journal of Chemical & Engineering Data*, 62, 3319–3333, <https://doi.org/10.1021/acs.jced.7b00363>, 2017.
- Kucinski, T. M., Dawson, J. N., and Freedman, M. A.: Size-Dependent Liquid–Liquid Phase Separation in Atmospherically Relevant Complex Systems, *The Journal of Physical Chemistry Letters*, 10, 6915–6920, <https://doi.org/10.1021/acs.jpcllett.9b02532>, pMID: 31638813, 20 <https://doi.org/10.1021/acs.jpcllett.9b02532>, 2019.
- Ohno, P. E., Brandão, L., Rainone, E. M., Aruffo, E., Wang, J., Qin, Y., and Martin, S. T.: Size Dependence of Liquid–Liquid Phase Separation by in Situ Study of Flowing Submicron Aerosol Particles, *The Journal of Physical Chemistry A*, 127, 2967–2974, <https://doi.org/10.1021/acs.jpca.2c08224>, pMID: 36947002, 2023.
- 25 Riipinen, I., Koponen, I. K., Frank, G. P., Hyvärinen, A.-P., Vanhanen, J., Lihavainen, H., Lehtinen, K. E. J., Bilde, M., and Kulmala, M.: Adipic and Malonic Acid Aqueous Solutions: Surface Tensions and Saturation Vapor Pressures, *The Journal of Physical Chemistry A*, 111, 12 995–13 002, <https://doi.org/10.1021/jp073731v>, pMID: 18044850, 2007.
- Sequeira, M. C., Pereira, M. F., Avelino, H. M., Caetano, F. J., and Fareleira, J. M.: Viscosity measurements of poly(ethyleneglycol) 400 [PEG 400] at temperatures from 293 K to 348 K and at pressures up to 50 MPa using the vibrating wire technique, *Fluid Phase Equilibria*, 30 <https://doi.org/https://doi.org/10.1016/j.fluid.2019.05.012>, 2019.
- Sigma-Aldrich: Technical Bulletin AL-128, Tech. rep., Sigma-Aldrich Corporation, [https://www.sigmaaldrich.com/deepweb/assets/sigmaaldrich/product/documents/394/249/al\\_techbull\\_al128.pdf](https://www.sigmaaldrich.com/deepweb/assets/sigmaaldrich/product/documents/394/249/al_techbull_al128.pdf), 2006.
- Součková, M., Klomfar, J., and Pátek, J.: Standard reference data for the air–liquid and vapor–liquid surface tension of benzene, *Fluid Phase Equilibria*, 356, 329–337, <https://doi.org/https://doi.org/10.1016/j.fluid.2013.07.053>, 2013.
- 35 Topping, D. O., McFiggans, G. B., Kiss, G., Varga, Z., Fachini, M. C., Decesari, S., and Mircea, M.: Surface tensions of multi-component mixed inorganic/organic aqueous systems of atmospheric significance: measurements, model predictions and importance for cloud activation predictions, *Atmospheric Chemistry and Physics*, 7, 2371–2398, <https://doi.org/10.5194/acp-7-2371-2007>, 2007.

- Tuckermann, R. and Cammenga, H. K.: The surface tension of aqueous solutions of some atmospheric water-soluble organic compounds, *Atmospheric Environment*, 38, 6135–6138, [https://doi.org/https://doi.org/10.1016/j.atmosenv.2004.08.005](https://doi.org/10.1016/j.atmosenv.2004.08.005), 2004.
- 40 Varga, Z., Kiss, G., and Hansson, H.-C.: Modelling the cloud condensation nucleus activity of organic acids on the basis of surface tension and osmolality measurements, *Atmospheric Chemistry and Physics*, 7, 4601–4611, <https://doi.org/10.5194/acp-7-4601-2007>, 2007.
- Vargaftik, N. B., Volkov, B. N., and Voljak, L. D.: International Tables of the Surface Tension of Water, *Journal of Physical and Chemical Reference Data*, 12, 817–820, <https://doi.org/10.1063/1.555688>, 1983.
